# Supplementary material for: ACYP1 Is a Pancancer Prognostic Indicator and Affects the Immune Microenvironment in LIHC
Source: Front Oncol. 2022 May 2;12:875097. doi: 10.3389/fonc.2022.875097 (PMC9108903; doi:10.3389/fonc.2022.875097)
Supplement: Supplementary file 4 [file Table_3.xlsx]

## Sheet: gsea_hallmark_output
ID	Description	setSize	enrichmentScore	NES	pvalue	p.adjust	qvalues	rank	leading_edge	core_enrichment
E2F_TARGETS	E2F_TARGETS	200	0.797089	2.01768	1e-10	1.075e-09	4.47368e-10	4335	tags=81%	list=13%	signal=71%	CDC20/MYBL2/TOP2A/KIF2C/BIRC5/ASF1B/PTTG1/CDCA8/CCNB2/CDK1/CENPM/PLK1/KIF4A/GINS1/KIF18B/MELK/DLGAP5/AURKB/UBE2T/TCF19/CDKN3/BUB1B/MKI67/MCM2/LMNB1/RRM2/TK1/STMN1/SPC24/RAD51AP1/SPC25/TRIP13/TACC3/CDKN2A/CDCA3/HMMR/RACGAP1/MCM3/CCNE1/MCM6/HMGB2/DEPDC1/MCM4/EZH2/CKS2/NCAPD2/CDKN2C/ORC6/RNASEH2A/H2AX/MAD2L1/E2F8/DNMT1/UBE2S/KPNA2/CDC25B/SMC4/SPAG5/CENPE/H2AZ1/MCM5/ESPL1/MCM7/CHEK1/HELLS/PSMC3IP/AUR…
G2M_CHECKPOINT	G2M_CHECKPOINT	199	0.775462	1.96176	1e-10	1.075e-09	4.47368e-10	4336	tags=75%	list=13%	signal=66%	CDC20/MYBL2/UBE2C/TOP2A/KIF2C/TPX2/BIRC5/PTTG1/TROAP/CCNB2/E2F1/CDK1/PLK1/KIF4A/NEK2/CENPA/CENPF/AURKB/PRC1/NUSAP1/CDC6/CDKN3/MKI67/MCM2/LMNB1/CDC45/NDC80/BUB1/KIF23/PBK/STMN1/CCNA2/TACC3/RAD54L/KIF11/TTK/HMMR/RACGAP1/MCM3/MCM6/SLC38A1/EZH2/EXO1/CKS2/KIF15/CDKN2C/GINS2/ORC6/H2AX/MAD2L1/CDC7/UBE2S/CCNF/KPNA2/CDC25B/SMC4/TRAIP/CENPE/H2AZ1/MCM5/ESPL1/E2F2/CHEK1/AURKA/PLK4/RBL1/BARD1/HMGA1/STIL/CDC25…
MITOTIC_SPINDLE	MITOTIC_SPINDLE	199	0.675718	1.70942	1e-10	1.075e-09	4.47368e-10	6668	tags=68%	list=20%	signal=55%	TOP2A/KIF2C/TPX2/BIRC5/CCNB2/CDK1/ANLN/PLK1/KIF4A/NEK2/DLGAP5/CENPF/ECT2/PRC1/NUSAP1/LMNB1/NDC80/BUB1/KIF23/KIF11/TTK/RACGAP1/KIF15/KNTC1/PIF1/SMC4/CENPE/NCK2/ESPL1/AURKA/CEP131/CLIP2/INCENP/FBXO5/FLNA/ARHGEF2/MARCKS/SASS6/MAPRE1/CENPJ/EPB41L2/KIF20B/EZR/KIF3C/CNTRL/WASF1/ABL1/FGD6/ARHGAP4/CEP250/CKAP5/PLEKHG2/ABR/ARHGAP27/SMC3/CD2AP/CEP72/WASF2/CCDC88A/SMC1A/PKD2/ARHGEF11/NIN/SAC3D1/LLGL1/CYTH2/…
MYC_TARGETS_V1	MYC_TARGETS_V1	200	0.628371	1.5906	1e-10	1.075e-09	4.47368e-10	8332	tags=74%	list=25%	signal=56%	CDC20/MCM2/CDC45/CCNA2/TYMS/MCM6/MCM4/RFC4/MAD2L1/KPNA2/H2AZ1/MCM5/MCM7/PCNA/CDK2/USP1/NAP1L1/DEK/TFDP1/RRM1/CDK4/CSTF2/SNRPA/HNRNPA1/UBA2/CAD/HNRNPA3/KPNB1/RNPS1/HNRNPR/YWHAQ/TRIM28/SNRPD1/NOP56/RAN/SRSF2/CBX3/HDAC2/SNRPD2/SET/IARS1/NCBP2/CCT5/HDDC2/ORC2/HNRNPD/ILF2/ERH/DUT/SSB/SNRPA1/UBE2E1/XPOT/HNRNPA2B1/PA2G4/SMARCC1/SNRPB2/PPM1G/SRSF1/LSM7/POLE3/HNRNPU/SRSF3/CCT2/RANBP1/LSM2/IFRD1/FBL/VBP1/X…
WNT_BETA_CATENIN_SIGNALING	WNT_BETA_CATENIN_SIGNALING	42	0.59959	1.38517	0.00430909	0.0108995	0.00453588	10936	tags=76%	list=33%	signal=51%	DKK1/FZD1/SKP2/KAT2A/CSNK1E/HDAC11/PPARD/AXIN1/HDAC2/DVL2/JAG1/ADAM17/HEY1/NOTCH1/NCOR2/MAML1/NCSTN/CCND2/RBPJ/LEF1/GNAI1/JAG2/PSEN2/HDAC5/TCF7/NUMB/AXIN2/FZD8/TP53/WNT6/CTNNB1/PTCH1
NOTCH_SIGNALING	NOTCH_SIGNALING	32	0.596213	1.33077	0.0169822	0.0317494	0.0132127	7672	tags=62%	list=23%	signal=48%	FZD1/KAT2A/SAP30/PPARD/FZD7/JAG1/NOTCH1/PRKCA/WNT5A/RBX1/DTX2/NOTCH2/MAML2/PSENEN/LFNG/APH1A/FBXW11/ARRB1/PSEN2/HES1
DNA_REPAIR	DNA_REPAIR	150	0.594669	1.49507	1.59291e-07	1.3699e-06	5.70094e-07	10639	tags=75%	list=32%	signal=51%	ZWINT/TYMS/RFC4/RAD51/FEN1/PCNA/POLD1/LIG1/RFC3/STX3/POLA1/POLA2/PRIM1/TAF6/RFC5/ALYREF/UPF3B/POLD3/RFC2/NT5C3A/ADA/RPA2/VPS37B/NELFE/NCBP2/SSRP1/SAC3D1/CANT1/DUT/GSDME/ADCY6/RAE1/SMAD5/RALA/NT5C/TAF12/NELFB/ERCC3/PNP/RBX1/SF3A3/POLR2H/DGCR8/NME1/AAAS/POLE4/TAF1C/GTF2H3/SUPT5H/NME3/CSTF3/NUDT21/DGUOK/POLR3C/TAF9/GTF3C5/SEC61A1/RAD52/ITPA/RNMT/POLR2D/TARBP2/POLR1H/POLH/GTF2H1/AGO4/NELFCD/POLR2G/GT…
PI3K_AKT_MTOR_SIGNALING	PI3K_AKT_MTOR_SIGNALING	105	0.584969	1.45037	2.5043e-05	0.00011965	4.97931e-05	11397	tags=75%	list=34%	signal=50%	SFN/E2F1/CDK1/SLC2A1/CDK2/IL2RG/TRAF2/CDK4/PAK4/RPS6KA1/RIT1/PLCB1/HRAS/CXCR4/PLCG1/MAP2K6/ACTR3/ARPC3/VAV3/MAP3K7/GRK2/MAPK1/ACTR2/MKNK1/UBE2N/TRIB3/CFL1/GRB2/ATF1/AP2M1/PPP1CA/PRKAA2/PIKFYVE/IRAK4/YWHAB/AKT1/MAPK9/NOD1/ARHGDIA/NCK1/DDIT3/CLTC/SMAD2/RAC1/SLA/TBK1/CSNK2B/PRKAG1/RPS6KA3/ACACA/ARF1/RALB/GSK3B/RPTOR/CDKN1B/MKNK2/PTPN11/PFN1/CAB39/THEM4/LCK/MAPKAP1/PRKAR2A/SQSTM1/RAF1/PIN1/CDKN1A/MAP…
TGF_BETA_SIGNALING	TGF_BETA_SIGNALING	54	0.569865	1.34464	0.0078381	0.0168519	0.00701304	10932	tags=70%	list=33%	signal=48%	PMEPA1/SERPINE1/IFNGR2/SMURF2/SKIL/HDAC1/TGFB1/NCOR2/ACVR1/WWTR1/TGFBR1/MAP3K7/SKI/PPP1R15A/RAB31/FKBP1A/SMAD3/CDKN1C/SMAD7/TRIM33/FNTA/SLC20A1/PPP1CA/TGIF1/THBS1/BMPR2/BMPR1A/ARID4B/RHOA/TJP1/BCAR3/XIAP/SMURF1/CDH1/JUNB/KLF10/CTNNB1/SMAD6
PROTEIN_SECRETION	PROTEIN_SECRETION	96	0.567554	1.4024	0.000501165	0.00153929	0.000640586	12708	tags=86%	list=38%	signal=54%	CTSC/SCRN1/PPT1/ANP32E/ATP1A1/YKT6/STX16/DNM1L/GALC/VPS45/M6PR/STX7/OCRL/CAV2/COPB1/CD63/STAM/GLA/CLTA/MAPK1/AP2B1/ADAM10/ATP7A/AP2M1/SSPN/TPD52/AP3B1/TMX1/NAPG/RAB22A/PAM/COG2/GNAS/ARFGEF2/ARFGAP3/CLTC/COPB2/COPE/RAB9A/SCAMP3/RPS6KA3/ARCN1/GOSR2/ARF1/STX12/MON2/ARFIP1/RAB5A/GBF1/ZW10/VAMP3/ICA1/VAMP4/TSG101/DOP1A/LMAN1/VPS4B/ATP6V1H/AP2S1/BET1/ARFGEF1/ERGIC3/CLCN3/SNX2/SEC31A/TMED2/AP3S1/SNAP23/…
MYC_TARGETS_V2	MYC_TARGETS_V2	58	0.563652	1.34053	0.00622817	0.0140953	0.00586587	10267	tags=76%	list=31%	signal=53%	PLK1/MCM4/MCM5/PLK4/HK2/CDK4/NOP56/TCOF1/CBX3/PRMT3/PA2G4/MRTO4/UNG/MAP3K6/DUSP2/UTP20/SLC29A2/NPM1/DCTPP1/SRM/NOP2/GNL3/RRP9/DDX18/PES1/PPRC1/EXOSC5/BYSL/FARSA/PUS1/LAS1L/NOLC1/PPAN/NOC4L/NIP7/RRP12/WDR43/TBRG4/SLC19A1/MYBBP1A/MPHOSPH10/IPO4/TMEM97/PHB
SPERMATOGENESIS	SPERMATOGENESIS	135	0.559217	1.39805	0.000102192	0.000399477	0.000166245	8598	tags=43%	list=26%	signal=32%	KIF2C/CCNB2/CDK1/NEK2/CDKN3/NCAPH/BUB1/TTK/EZH2/RFC4/AURKA/PCSK1N/RPL39L/CLGN/SLC2A5/DBF4/GSTM3/TOPBP1/MAST2/TUBA3C/ARL4A/PGS1/PARP2/AGFG1/GMCL1/MLF1/TSN/NAA11/CFTR/COIL/YBX2/SLC12A2/CNIH2/STRBP/ELOVL3/MLLT10/HSPA2/PSMG1/IP6K1/NF2/IL13RA2/CHFR/PHKG2/TLE4/GAD1/DMC1/ZC3H14/PCSK4/SPATA6/PIAS2/GFI1/STAM2/VDAC3/CRISP2/PRKAR2A/TNNI3/CSNK2A2/RAD17
TNFA_SIGNALING_VIA_NFKB	TNFA_SIGNALING_VIA_NFKB	200	0.54871	1.38896	4.04403e-06	2.89822e-05	1.20612e-05	10618	tags=62%	list=32%	signal=42%	SPHK1/CXCL1/PFKFB3/CCL20/PHLDA2/SLC2A6/MSC/LIF/CXCL6/IER3/TNFAIP2/PLAUR/PMEPA1/DRAM1/FUT4/SERPINE1/CLCF1/F2RL1/TNFAIP6/MARCKS/IFNGR2/NFKBIE/TAP1/AREG/VEGFA/TNFAIP8/OLR1/CSF1/BCL2A1/ICAM1/TRIP10/BTG3/IER5/CXCL10/JAG1/LAMB3/TNC/IL15RA/B4GALT5/RIPK2/BIRC3/IL18/F3/PLAU/DUSP4/RELB/MXD1/TNFAIP3/PLEK/TNFSF9/MAP3K8/SNN/TRAF1/GPR183/CXCL3/TLR2/PTPRE/PPP1R15A/DUSP2/IRF1/CD44/PTGER4/CCNL1/SMAD3/BCL3/FOSL2/N…
APICAL_SURFACE	APICAL_SURFACE	44	0.547766	1.27242	0.0458716	0.0758645	0.0315715	11389	tags=64%	list=34%	signal=42%	BRCA1/PLAUR/EFNA5/IL2RG/GSTM3/CROCC/APP/NCOA6/SULF2/DCBLD2/LYPD3/HSPB1/ADAM10/AKAP7/MDGA1/IL2RB/FLOT2/ATP8B1/AFAP1L2/TMEM8B/LYN/GATA3/THY1/RTN4RL1/PKHD1/CRYBG1/GHRL/CX3CL1
UNFOLDED_PROTEIN_RESPONSE	UNFOLDED_PROTEIN_RESPONSE	113	0.544062	1.35382	0.00118852	0.00319415	0.00132927	10093	tags=68%	list=30%	signal=48%	H2AX/ASNS/FUS/ERO1A/KDELR3/CNOT6/VEGFA/DKC1/YWHAZ/NOP56/NFYA/IARS1/EIF4EBP1/MTHFD2/KHSRP/CXXC1/EDC4/XPOT/SLC7A5/ARFGAP1/FKBP14/ZBTB17/CKS1B/KIF5B/EIF4A2/EXOSC10/EXOSC2/EXOSC9/NPM1/LSM4/EIF4A3/NABP1/TATDN2/DNAJA4/CNOT2/SSR1/DDIT4/WIPI1/DCP2/RRP9/CCL2/LSM1/STC2/TARS1/SLC30A5/SLC1A4/DCTN1/BANF1/EIF4A1/EIF2AK3/ATF4/MTREX/HYOU1/DCP1A/PARN/PAIP1/GOSR2/EXOC2/SHC1/ALDH18A1/PDIA6/SEC11A/EXOSC5/TTC37/CEBPG…
ALLOGRAFT_REJECTION	ALLOGRAFT_REJECTION	200	0.5421	1.37223	1.41023e-05	8.66286e-05	3.60511e-05	10063	tags=68%	list=30%	signal=48%	CDKN2A/MMP9/CAPG/LIF/BRCA1/ELF4/FLNA/IL2RG/HIF1A/TRAF2/CD7/IFNGR2/LTB/TAP1/CD3D/CXCL9/CSF1/GLMN/ICAM1/TIMP1/CD47/TGFB1/DEGS1/CXCL13/SPI1/TGFB2/IL27RA/RIPK2/IL18/CCND3/UBE2D1/BCAT1/ABI1/DARS1/BCL10/MAP3K7/TLR2/RPS19/WARS1/GCNT1/FGR/STAT1/NME1/UBE2N/PTPN6/SOCS5/BCL3/NPM1/HLA-DOB/ITGB2/FYB1/INHBB/IL2RA/IL4R/EIF4G3/NCF4/CCND2/TPD52/DYRK3/SOCS1/JAK2/CD86/CD8A/FCGR2B/AKT1/MAP4K1/CCL5/GZMB/CD2/IL15/EIF3…
EPITHELIAL_MESENCHYMAL_TRANSITION	EPITHELIAL_MESENCHYMAL_TRANSITION	200	0.539623	1.36596	1.85703e-05	9.98152e-05	4.15387e-05	9893	tags=61%	list=29%	signal=43%	SPP1/CXCL1/ENO2/DKK1/CTHRC1/MMP14/POSTN/SLC6A8/CXCL8/MMP1/CAPG/MCM7/SERPINE2/APLP1/LAMC2/CXCL6/PTHLH/PLAUR/IGFBP3/PMEPA1/TPM4/SERPINE1/FLNA/SERPINH1/ITGAV/GPC1/FBLN1/COMP/TPM2/COL1A1/PFN2/LOX/PLOD2/GPX7/LAMC1/QSOX1/TNFRSF12A/ITGA2/AREG/CALU/TNFRSF11B/EMP3/CDH6/VEGFA/MATN3/COLGALT1/COL5A2/TIMP1/COL1A2/FSTL3/TGFB1/SGCB/P3H1/VCAN/TNC/LGALS1/COL16A1/MEST/TNFAIP3/ITGA5/BASP1/DAB2/ADAM12/WNT5A/ITGB1/WI…
MTORC1_SIGNALING	MTORC1_SIGNALING	200	0.533117	1.34949	4.01302e-05	0.00017256	7.18119e-05	11077	tags=72%	list=33%	signal=48%	PLK1/G6PD/MCM2/RRM2/BUB1/SLC1A5/MCM4/EGLN3/CCNF/CTSC/AURKA/SLC2A1/TES/CDC25A/ALDOA/ASNS/HK2/TUBG1/SLC6A6/MLLT11/DDX39A/TFRC/SERPINH1/PSPH/ERO1A/NUP205/ENO1/PLOD2/EEF1E1/RIT1/YKT6/ME1/CXCR4/ADD3/MTHFD2/ACTR3/CACYBP/M6PR/GMPS/CCT6A/SLC7A5/BCAT1/GSR/SKAP2/CORO1A/GAPDH/RPA1/TUBA4A/GLA/STIP1/ACLY/UNG/IFRD1/PPP1R15A/TOMM40/PNP/FADS1/WARS1/ACTR2/SLC7A11/TRIB3/PSME3/GGA2/NFYC/ITGB2/ARPC5L/IFI30/DHFR/PSMD…
ANGIOGENESIS	ANGIOGENESIS	36	0.530752	1.20526	0.135802	0.188371	0.0783919	3344	tags=44%	list=10%	signal=40%	SPP1/POSTN/CXCL6/S100A4/TNFRSF21/ITGAV/VEGFA/OLR1/COL5A2/TIMP1/JAG1/APP/VCAN/PDGFA/FGFR1/COL3A1
APICAL_JUNCTION	APICAL_JUNCTION	200	0.518999	1.31375	0.000262025	0.000938923	0.000390739	11408	tags=66%	list=34%	signal=44%	CLDN4/MAPK13/MMP9/ITGB4/ITGA3/SGCE/LAMC2/SRC/TUBG1/VASP/GRB7/CERCAM/MPZL1/ADAM9/NECTIN1/EPB41L2/RAC2/ITGA2/TNFRSF11B/CDH6/ZYX/ICAM1/MDK/AMIGO2/HRAS/SYK/PLCG1/INPPL1/VCAN/LAMB3/SDC3/SIRPA/FSCN1/ADAM15/CNN2/NECTIN4/COL16A1/VCL/SKAP2/TSC1/LIMA1/ACTN4/CLDN9/PBX2/TRAF1/PARD6G/RRAS/ITGB1/CAP1/YWHAH/ARPC2/CD276/CDH11/ACTG1/AMH/FYB1/FLNC/PKD1/CD86/DLG1/ACTB/MPZL2/ACTN1/ALOX15B/EVL/CLDN18/NF2/PTPRC/RHOF/G…
GLYCOLYSIS	GLYCOLYSIS	200	0.516121	1.30647	0.000398731	0.00131888	0.000548861	6202	tags=47%	list=18%	signal=39%	PKM/CDK1/KIF20A/GAL3ST1/G6PD/CENPA/STMN1/HMMR/SLC16A3/DEPDC1/ENO2/EGLN3/B3GNT3/SOX9/PFKP/AURKA/NASP/TGFA/ALDOA/IER3/HK2/IGFBP3/PYGB/AGRN/GPC1/ADORA2B/GNPDA1/TPBG/ERO1A/ENO1/SAP30/PLOD2/EFNA3/KDELR3/QSOX1/ZNF292/VEGFA/GYS1/ME1/KIF2A/CLN6/CXCR4/CHST4/GPC4/VCAN/SDC3/BIK/CHST1/TFF3/RBCK1/PDK3/RPE/MED24/FUT8/MIOX/CLDN9/ME2/COL5A1/CD44/SPAG4/XYLT2/MIF/B4GALT4/HS2ST1/ELF3/POLR3K/CASP6/P4HA2/GFPT1/RRAGD/…
P53_PATHWAY	P53_PATHWAY	200	0.506678	1.28256	0.00102166	0.00292876	0.00121882	11284	tags=66%	list=34%	signal=44%	SFN/SPHK1/CDKN2A/H2AW/ITGB4/PCNA/KRT17/LIF/TGFA/IER3/BAK1/DRAM1/TM4SF1/S100A4/RHBDF2/TAP1/PIDD1/CDKN2B/RGS16/ST14/ADA/RAD9A/S100A10/RALGDS/HRAS/NDRG1/IER5/RAP2B/DEF6/CSRNP2/CDK5R1/TGFB1/BAX/APP/ABCC5/IP6K2/PRMT2/NOTCH1/TAX1BP3/TRAFD1/RAD51C/PDGFA/PVT1/HEXIM1/CCND3/MXD1/RRAD/WRAP73/TNFSF9/ACVR1B/UPP1/PTPRE/PPP1R15A/SP1/TPRKB/MAPKAPK3/SERTAD3/SLC7A11/CCP110/VDR/PPM1D/NOL8/TRIB3/APAF1/PERP/INHBB/IFI…
IL6_JAK_STAT3_SIGNALING	IL6_JAK_STAT3_SIGNALING	87	0.499348	1.2252	0.0552209	0.0879444	0.0365986	11006	tags=68%	list=33%	signal=46%	CXCL1/BAK1/IL2RG/TNFRSF21/IFNGR2/LTB/CXCL9/OSMR/TNFRSF12A/CSF1/CXCL10/TGFB1/CXCL13/REG1A/IL15RA/CBL/ACVR1B/MAP3K8/CXCL3/TLR2/IRF1/CD44/CSF2RA/STAT1/GRB2/CSF3R/IL2RA/IL4R/PTPN1/SOCS1/PTPN2/TYK2/IRF9/IL1B/PDGFC/CXCL11/HMOX1/PIM1/CSF2RB/IL10RB/SOCS3/IL12RB1/PTPN11/STAM2/CD38/JUN/IL17RA/CCR1/INHBE/PIK3R5/ITGA4/CD9/EBI3/HAX1/TNF/IL7/CRLF2/IL18R1/CNTFR
INFLAMMATORY_RESPONSE	INFLAMMATORY_RESPONSE	200	0.489203	1.23833	0.00568868	0.0135896	0.00565541	12335	tags=69%	list=37%	signal=44%	SPHK1/RGS1/MMP14/CXCL8/CCL20/LIF/CXCL6/PLAUR/SLC7A1/SERPINE1/TNFAIP6/HIF1A/MEP1A/IFNGR2/ADORA2B/TPBG/CXCL9/OSMR/RGS16/EMP3/LAMP3/OLR1/CSF1/ICAM1/TIMP1/CXCL10/P2RX4/SEMA4D/IL15RA/PTAFR/RIPK2/SRI/IL18/ADM/F3/ABI1/MXD1/GABBR1/NPFFR2/ITGA5/TNFSF9/ACVR1B/GPR183/TLR2/PTPRE/IRF1/PTGER4/DCBLD2/CYBB/NMI/ITGB8/TNFSF15/CSF3R/IL4R/ATP2B1/GNA15/ATP2C1/CHST2/RHOG/NOD2/CCL5/CLEC5A/IL15/IL2RB/FPR1/LCP2/CCL2/ATP2…
INTERFERON_ALPHA_RESPONSE	INTERFERON_ALPHA_RESPONSE	97	0.488013	1.20717	0.0641926	0.0985815	0.0410253	12515	tags=66%	list=37%	signal=42%	TAP1/PLSCR1/LAMP3/CSF1/CXCL10/LGALS3BP/CD47/TRAFD1/RIPK2/PSMB9/IRF1/WARS1/CASP8/NMI/IFI30/IL4R/CASP1/RNF31/ELF1/MVB12A/TRIM25/TDRD7/IL15/GBP2/IRF9/CXCL11/SAMD9/CMTR1/CNP/LPAR6/PNPT1/SAMD9L/BATF2/TRIM21/EIF2AK2/NCOA7/TENT5A/IRF7/PSMA3/IRF2/PSMB8/RTP4/ADAR/CCRL2/LY6E/OGFR/PARP12/IFIH1/SELL/TRIM5/IFI35/NUB1/GBP4/PROCR/SP110/IL7/PSME1/TRIM14/PSME2/CD74/UBA7/CMPK2/MOV10/TXNIP
INTERFERON_GAMMA_RESPONSE	INTERFERON_GAMMA_RESPONSE	200	0.481115	1.21785	0.0112841	0.0220553	0.00917844	10900	tags=62%	list=32%	signal=42%	PFKP/TNFAIP2/TNFAIP6/HIF1A/TAP1/ARL4A/CXCL9/PLSCR1/PELI1/ICAM1/CXCL10/LGALS3BP/MTHFD2/IL15RA/NUP93/TRAFD1/RIPK2/SRI/XCL1/RBCK1/PSMB9/OAS3/TNFAIP3/UPP1/SECTM1/PNP/IRF1/WARS1/SLAMF7/ARID5B/CASP7/STAT1/MVP/CASP8/NMI/PTPN6/CASP3/FCGR1A/IFI30/IL4R/IRF5/PTPN1/NLRC5/SSPN/CASP1/SOCS1/RNF31/CASP4/PTPN2/JAK2/CD86/MX2/TRIM25/CCL5/TDRD7/IL15/BPGM/PML/IL2RB/NOD1/NCOA3/FPR1/RNF213/LCP2/CCL2/IRF9/HLA-DQA1/CXCL1…
IL2_STAT5_SIGNALING	IL2_STAT5_SIGNALING	199	0.480601	1.21582	0.0109852	0.0220553	0.00917844	10938	tags=58%	list=33%	signal=40%	SPP1/CDC6/CCNE1/SLC1A5/MUC1/CAPG/APLP1/LIF/CDCP1/ETV4/HK2/ITIH5/TNFRSF21/ITGAV/LTB/ARL4A/UCK2/RGS16/PLSCR1/TNFRSF18/NCS1/PHTF2/CSF1/AGER/NDRG1/CKAP4/SYNGR2/CXCL10/P2RX4/TWSG1/ANXA4/CDC42SE2/PRAF2/CTLA4/CCND3/MXD1/SERPINB6/MAP3K8/TRAF1/GLIPR2/IGF1R/TNFRSF4/PNP/CD44/NFKBIZ/SWAP70/S100A1/SLC29A2/PLAGL1/CASP3/CDKN1C/RRAGD/GUCY1B1/IL2RA/ODC1/IL4R/SPRY4/DENND5A/CCND2/POU2F1/CD83/PRNP/SOCS1/CD86/IKZF4/H…
ESTROGEN_RESPONSE_LATE	ESTROGEN_RESPONSE_LATE	200	0.47494	1.20222	0.0181738	0.0325614	0.0135506	5633	tags=36%	list=17%	signal=30%	CDC20/KRT19/TOP2A/SFN/KIF20A/AGR2/CDC6/MAPK13/GINS2/RNASEH2A/TFF1/PTGES/PLK4/STIL/S100A9/LAMC2/TMPRSS3/RBBP8/XRCC3/PKP3/FAM102A/RAPGEFL1/TPBG/FABP5/CA12/ALDH3B1/AREG/ST14/KCNK5/MICB/MDK/BTG3/HSPB8/GJB3/ADD3/CLIC3/METTL3/CYP26B1/SNX10/NBL1/CKB/SLC26A2/NCOR2/TFF3/NXT1/DLG5/SLC7A5/IGSF1/MEST/MYOF/ST6GALNAC2/GLA/LLGL2/TJP3/DUSP2/CD44/RAB31/OVOL2/PTPN6/PERP/FGFR3/SLC22A5/CPE/MAPT/JAK2/BATF/CELSR2/SEMA…
UV_RESPONSE_DN	UV_RESPONSE_DN	144	0.471991	1.1848	0.041	0.07052	0.0293474	8487	tags=50%	list=25%	signal=38%	ABCC1/PTGFR/SLC7A1/SERPINE1/PIAS3/ANXA2/ADORA2B/COL1A1/LAMC1/RUNX1/COL5A2/COL1A2/ADD3/ANXA4/SYNJ2/MTA1/SRI/F3/ZMIZ1/FZD2/PRKCA/DAB2/RASA2/IGF1R/LTBP1/GCNT1/COL3A1/SMAD3/NIPBL/NEK7/PIK3CD/SMAD7/ATP2B1/NOTCH2/ATP2C1/YTHDC1/DLG1/CDK13/NRP1/DYRK1A/COL11A1/CAV1/MIOS/ATXN1/TENT4A/SCAF8/BHLHE40/LPAR1/AKT3/WDR37/CELF2/PRDM2/BMPR1A/PMP22/SPOP/AGGF1/PRKAR2B/CDKN1B/NFKB1/CITED2/ATRX/RGS4/TJP1/ADGRL2/ERBB2/V…
HEDGEHOG_SIGNALING	HEDGEHOG_SIGNALING	36	0.457891	1.03981	0.435185	0.534656	0.222501	11468	tags=72%	list=34%	signal=48%	ADGRG1/VEGFA/CDK5R1/HEY1/TLE3/LDB1/CRMP1/CELSR1/PML/GLI1/NRP1/NRCAM/MYH9/RASA1/NF1/DPYSL2/VLDLR/RTN1/ACHE/THY1/AMOT/OPHN1/PTCH1/CNTFR/SCG2/L1CAM
UV_RESPONSE_UP	UV_RESPONSE_UP	158	0.44855	1.13053	0.128871	0.184715	0.0768705	10194	tags=58%	list=30%	signal=41%	EPCAM/CCNE1/ENO2/RFC4/MMP14/H2AX/SLC6A8/CTSV/FEN1/TYRO3/GLS/CDK2/ALDOA/ASNS/PRKCD/BAK1/NPTX2/PPT1/TFRC/CLCN2/FMO1/TAP1/CDKN2B/PRPF3/CHKA/YKT6/MARK2/ICAM1/BTG3/POLG2/BSG/E2F5/PARP2/ATP6V1F/MAPK8IP2/CCND3/RRAD/AMD1/BCL2L11/TUBA4A/HSPA13/POLE3/STIP1/HNRNPU/NUP58/IRF1/POLR2H/STK25/CASP3/CDKN1C/TGFBRAP1/PPP1R2/HSPA2/NXF1/AGO2/EIF2S3/STARD3/PPAT/PDLIM3/TARS1/KCNH2/CNP/HMOX1/CYB5B/WIZ/NFKBIA/ARRB2/PDAP1…
HYPOXIA	HYPOXIA	200	0.443975	1.12384	0.103896	0.154053	0.0641101	8368	tags=49%	list=25%	signal=37%	ENO2/PFKFB3/PFKP/SLC2A1/TES/ALDOA/IER3/HK2/PLAUR/IGFBP3/SLC6A6/SERPINE1/SLC2A5/S100A4/ANXA2/GPC1/WSB1/ADORA2B/TPBG/ERO1A/CA12/ENO1/SAP30/LOX/EFNA3/KDELR3/VHL/ZNF292/TMEM45A/VEGFA/GYS1/NDRG1/CXCR4/CAVIN3/GPC4/MAP3K1/SDC3/AMPD3/CSRP2/BNIP3L/ADM/F3/PDK3/TNFAIP3/GAPDH/PRKCA/PPP1R15A/COL5A1/KDM3A/CCNG2/MIF/JMJD6/FOSL2/CDKN1C/CASP6/P4HA2/NAGK/INHA/RRAGD/ATP7A/TGFB3/ANKZF1/PGF/TPD52/CHST2/DDIT4/RBPJ/HK1…
APOPTOSIS	APOPTOSIS	161	0.440268	1.11039	0.168831	0.219992	0.0915512	10990	tags=61%	list=33%	signal=41%	TOP2A/HMGB2/ENO2/CDC25B/CDK2/IER3/BRCA1/CASP2/LGALS3/PPT1/BMF/TSPO/TAP1/TNFRSF12A/PMAIP1/PAK1/BTG3/TIMP1/DNM1L/BAX/APP/TGFB2/BIK/BIRC3/IL18/TIMP2/BNIP3L/GSR/BCL10/BCL2L11/IRF1/CD44/RHOT2/CASP7/CASP8/HSPB1/CASP3/CASP6/DFFA/PEA15/SMAD7/CCND2/GNA15/SLC20A1/CASP1/ANXA1/CASP4/PPP2R5B/BCL2L2/IGFBP6/RARA/CD2/MADD/WEE1/LEF1/DDIT3/CAV1/IL1B/ROCK1/BCL2L1/HMOX1/SPTAN1/CREBBP/PLCB2/LMNA/PSEN2/ERBB3/CDKN1B/ER…
ESTROGEN_RESPONSE_EARLY	ESTROGEN_RESPONSE_EARLY	200	0.437181	1.10664	0.146853	0.197334	0.0821218	10103	tags=51%	list=30%	signal=36%	KRT19/SFN/MUC1/TFF1/PTGES/SLC2A1/TTC39A/TMPRSS3/RBBP8/TMEM164/FAM102A/RAPGEFL1/TPBG/CA12/ALDH3B1/MYBL1/UGCG/AREG/KCNK5/PMAIP1/MICB/SLC39A6/SLC37A1/UNC119/HSPB8/ADD3/CLIC3/CYP26B1/NBL1/SLC26A2/NCOR2/CANT1/TFF3/CELSR1/NXT1/SLC7A5/OLFML3/MYOF/MED24/GLA/TJP3/IGF1R/CD44/RAB31/ISG20L2/OVOL2/ELF3/INHBB/ZNF185/LAD1/NAV2/SLC22A5/MED13L/MAPT/TGIF2/JAK2/ELF1/RARA/TBC1D30/NADSYN1/CELSR2/SEMA3B/TUBB2B/INPP5F/…
KRAS_SIGNALING_UP	KRAS_SIGNALING_UP	200	0.420581	1.06462	0.28971	0.366398	0.152479	6470	tags=40%	list=19%	signal=32%	SPP1/USH1C/MMP9/MMD/CCL20/SNAP25/SOX9/PLEK2/LIF/PCSK1N/ETV4/PLAUR/IGFBP3/HKDC1/MMP10/F2RL1/IL2RG/MMP11/ETV1/ERO1A/RGS16/ADAM8/ITGA2/CXCL10/CXCR4/ADAM17/MAP3K1/NIN/BTBD3/FCER1G/ETV5/GPNMB/GPRC5B/BIRC3/GALNT3/CBX8/LAT2/PTBP2/LAPTM5/PLAU/TNFAIP3/CBL/PRELID3B/TRAF1/TMEM158/SLPI/PPP1R15A/CSF2RA/KCNN4/DCBLD2/ADAMDEC1/ITGB2/AMMECR1/STRN/CCND2/FBXO4/ZNF639/CPE/EPHB2/MPZL2/GABRA3/MAP4K1/RBM4/SDCCAG8/SEMA3…
REACTIVE_OXYGEN_SPECIES_PATHWAY	REACTIVE_OXYGEN_SPECIES_PATHWAY	49	0.402773	0.944208	0.644241	0.748712	0.311581	10782	tags=49%	list=32%	signal=33%	G6PD/ABCC1/PFKP/CDKN2D/GSR/SBNO2/LSP1/STK25/PRNP/PTPA/TXNRD1/TXN/NQO1/OXSR1/LAMTOR5/SCAF4/ERCC2/PRDX1/MBP/NDUFB4/EGLN2/JUNB/SELENOS/HHEX
MYOGENESIS	MYOGENESIS	200	0.401814	1.01712	0.461538	0.551282	0.22942	12398	tags=52%	list=37%	signal=33%	SPHK1/KLF5/SLC6A8/ITGB4/IGFBP3/DMPK/PDLIM7/AGRN/TPM2/COL1A1/MYL6B/TNNT1/RIT1/HSPB8/SYNGR2/TGFB1/TNNI2/DENND2B/APP/PKIA/TPM3/CKB/NOTCH1/EPHB3/SH2B1/SPDEF/WWTR1/SMTN/PTP4A3/ADAM12/IFRD1/ITGB1/EIF4A2/LSP1/TEAD4/COL3A1/SOD3/NAV2/BIN1/SSPN/COL6A3/PRNP/MAPK12/CACNA1H/PFKM/ATP6AP1/NQO1/FLII/STC2/ITGB5/FABP3/MB/PPFIA4/CFD/BHLHE40/MYH9/KCNH2/SPTAN1/EFS/COL6A2/PSEN2/ERBB3/SPEG/ACHE/PLXNB2/COL4A2/HDAC5/ACTA…
ANDROGEN_RESPONSE	ANDROGEN_RESPONSE	100	0.379075	0.937696	0.698699	0.790633	0.329027	10645	tags=46%	list=32%	signal=32%	KRT19/STK39/PMEPA1/ITGAV/GPD1L/ABCC4/TNFAIP8/UBE2I/NDRG1/SLC26A2/TMEM50A/SPDEF/CCND3/GSR/PA2G4/ZMIZ1/SMS/FADS1/CENPN/ARID5B/XRCC5/TPD52/APPBP2/ACTN1/AKT1/PIAS1/SRF/GUCY1A1/XRCC6/GNAI3/RPS6KA3/PGM3/UBE2J1/CAMKK2/ELK4/SRP19/LMAN1/RRP12/KRT8/ACSL3/ADRM1/NGLY1/VAPA/ELOVL5/H1-0/PTPN21
HEME_METABOLISM	HEME_METABOLISM	198	0.361145	0.913734	0.806194	0.88888	0.369913	11653	tags=50%	list=35%	signal=33%	IGSF3/SLC6A8/E2F2/SLC2A1/ASNS/RAP1GAP/BLVRA/SMOX/TFRC/CTSE/RBM38/OSBP2/SLC10A3/EPOR/SLC6A9/NARF/VEZF1/BSG/GMPS/BNIP3L/CCND3/MARK3/CDC27/AGPAT4/TRAK2/RBM5/CDR2/FBXO34/UCP2/SLC7A11/XPO7/NEK7/P4HA2/RNF19A/TOP1/MBOAT2/EPB41/PPP2R5B/EZH1/CPOX/TNS1/BPGM/KHNYN/LRP10/CIR1/UBAC1/TRIM10/ENDOD1/MFHAS1/PPOX/PICALM/FBXO9/KEL/BACH1/MOSPD1/DMTN/GDE1/RAD23A/TCEA1/FOXO3/FOXJ2/SLC25A37/BCAM/HMBS/MKRN1/EIF2AK1/PSMD…
CHOLESTEROL_HOMEOSTASIS	CHOLESTEROL_HOMEOSTASIS	74	0.350751	0.850826	0.835354	0.898005	0.373711	3647	tags=22%	list=11%	signal=19%	S100A11/ANXA13/PLAUR/LGALS3/ANXA5/FABP5/PLSCR1/TNFRSF12A/MAL2/CHKA/JAG1/GPX8/ABCA2/PDK3/ACTG1/TRIB3
COMPLEMENT	COMPLEMENT	200	0.344827	0.872867	0.88012	0.923053	0.384134	9874	tags=52%	list=29%	signal=37%	CXCL1/MMP12/MMP14/CTSV/CTSC/S100A9/SRC/PRKCD/PLAUR/LGALS3/SERPINE1/GPD2/ANXA5/DYRK2/GCA/ADAM9/PDP1/S100A13/ITGAM/PLSCR1/OLR1/ERAP2/ME1/TIMP1/KIF2A/CDK5R1/SIRT6/FCER1G/TIMP2/F3/PSMB9/PLA2G7/TNFAIP3/PLEK/PRDM4/RCE1/IRF1/CASP7/GMFB/CASP3/GRB2/AKAP10/CASP1/RHOG/CASP4/JAK2/DOCK10/CCL5/GZMB/EHD1/APOBEC3G/STX4/LCP2/USP14/LTA4H/RNF4/WAS/GNB4/TFPI2/DGKH/PLA2G4A/GNAI3/CBLB/PIM1/CTSS/PPP4C/APOBEC3F/GZMA/XPN…
PANCREAS_BETA_CELLS	PANCREAS_BETA_CELLS	40	0.309498	0.711268	0.943357	0.965818	0.401932	9278	tags=32%	list=28%	signal=24%	SCGN/SYT13/PDX1/VDR/STXBP1/ELP4/AKT3/CHGA/SEC11A/MAFB/SRP9/SRP14/SST
KRAS_SIGNALING_DN	KRAS_SIGNALING_DN	200	0.265771	0.672749	0.997003	0.997003	0.414909	14270	tags=44%	list=42%	signal=26%	RIBC2/TFF2/BARD1/PTGFR/MACROH2A2/PDCD1/MFSD6/ADRA2C/SKIL/TGFB2/MSH5/SNN/ZNF112/YBX2/LYPD3/KMT2D/CDKAL1/FGFR3/GTF3C5/CHST2/CD207/GPR19/AKR1B10/CELSR2/SLC6A14/TCF7L1/LFNG/IDUA/CPA2/SLC16A7/DLK2/NR6A1/VPS50/DTNB/SPHK2/EDN1/NUDT11/TNNI3/OXT/SLC29A3/CD80/BTG2/PTPRJ/KLHDC8A/CDH16/EGF/IFNG/SLC30A3/HNF1A/TGM1/ATP6V1B1/CLSTN3/PLAG1/CAPN9/HSD11B2/TENT5C/TFCP2L1/CNTFR/KCND1/PDE6B/MTHFR/ASB7/SHOX2/MAST3/KRT1…

## Sheet: gsva_hallmark_output
	TCGA-G3-AAV0-01	TCGA-DD-AAE3-01	TCGA-DD-A118-01	TCGA-DD-A1EF-01	TCGA-DD-A11D-01	TCGA-G3-A6UC-01	TCGA-WJ-A86L-01	TCGA-CC-5263-01	TCGA-DD-AAE6-01	TCGA-K7-A6G5-01	TCGA-DD-A1EL-01	TCGA-G3-A7M6-01	TCGA-DD-AAE4-01	TCGA-MI-A75G-01	TCGA-DD-AACQ-01	TCGA-DD-AADV-01	TCGA-LG-A9QD-01	TCGA-G3-A25T-01	TCGA-DD-AADB-01	TCGA-UB-A7MA-01	TCGA-DD-AAD0-01	TCGA-BC-4072-01	TCGA-DD-AACD-01	TCGA-DD-AAE7-01	TCGA-DD-AADJ-01	TCGA-UB-A7MD-01	TCGA-CC-5259-01	TCGA-HP-A5MZ-01	TCGA-DD-AACS-01	TCGA-DD-A39X-01	TCGA-DD-AAEE-01	TCGA-2Y-A9GU-01	TCGA-CC-A7IE-01	TCGA-WX-AA44-01	TCGA-G3-A7M8-01	TCGA-ED-A7XP-01	TCGA-BW-A5NQ-01	TCGA-DD-A3A5-01	TCGA-DD-AADM-01	TCGA-FV-A3R3-01	TCGA-DD-AACL-01	TCGA-DD-A4NJ-01	TCGA-DD-AADU-01	TCGA-CC-A7IF-01	TCGA-CC-A5UE-01	TCGA-DD-AAVW-01	TCGA-CC-A9FW-01	TCGA-DD-A4NQ-01	TCGA-DD-A3A7-01
HALLMARK_TNFA_SIGNALING_VIA_NFKB	-0.433909	0.0471243	-0.302409	-0.204683	-0.00515419	-0.316659	-0.375576	0.105901	-0.571338	0.393482	-0.146018	-0.0248588	-0.00257369	-0.189184	-0.362441	-0.43764	0.170463	0.0555399	0.0667982	0.0599317	-0.23164	0.364054	-0.213783	0.0960258	-0.267289	0.580034	-0.334602	0.519316	-0.0547977	-0.00817919	-0.514471	-0.518157	0.302097	0.129122	0.0542483	-0.272723	-0.109831	-0.221524	-0.272544	0.203751	-0.0299118	0.321806	0.15135	-0.532146	-0.405248	0.010932	-0.30026	0.238871	-0.266524
HALLMARK_HYPOXIA	-0.220729	0.128144	0.106284	-0.214322	0.230349	-0.244155	-0.302207	0.236277	-0.364352	0.189094	-0.270464	-0.238935	-0.0242169	0.0563816	-0.365333	-0.152489	0.0308088	0.100758	-0.127981	-0.0285586	-0.0696418	0.142928	-0.150514	0.115013	-0.0385234	0.317395	0.0087386	0.251013	-0.055366	0.154397	-0.406062	-0.177326	0.0529054	-0.00211534	0.0393936	-0.0668396	-0.329801	-0.0509114	-0.181725	0.330274	0.0612241	0.0757484	-0.0724105	-0.26147	-0.0595341	0.0348004	-0.066438	0.172157	-0.0482216
HALLMARK_CHOLESTEROL_HOMEOSTASIS	-0.305963	0.0795862	-0.12322	-0.0377962	0.353073	-0.0416142	0.108147	-0.0562889	0.0549059	0.345002	-0.15779	-0.442628	-0.0473172	0.386079	-0.121452	-0.407755	0.0148224	-0.277666	0.29564	-0.55714	-0.0514037	-0.110171	-0.207209	-0.19334	0.205873	-0.0978549	-0.169042	0.150795	0.137118	0.0107507	-0.200749	-0.305127	-0.185946	0.0180903	-0.284922	-0.444509	-0.0812713	0.319282	-0.0296112	-0.359177	-0.024946	0.124553	-0.147094	-0.267791	0.193828	-0.0994516	0.346026	0.107911	-0.268607
HALLMARK_MITOTIC_SPINDLE	-0.584046	-0.597916	0.281502	0.345739	-0.0855363	-0.0872906	0.181114	0.555621	0.00529124	-0.539571	0.286192	0.400053	-0.51811	-0.442701	-0.161549	0.307297	-0.57404	0.123732	0.395184	0.445216	0.126703	0.438299	-0.602971	-0.578045	-0.465782	0.0440481	-0.510271	-0.383371	0.450665	-0.502913	-0.284301	0.0428513	-0.0150949	0.333155	-0.470642	0.136449	0.183818	-0.243902	-0.560705	0.1221	-0.0735066	0.464677	-0.566778	-0.110626	0.284527	0.251228	0.202605	-0.00279472	-0.456136
HALLMARK_WNT_BETA_CATENIN_SIGNALING	-0.458523	-0.257527	0.260953	0.398217	-0.164253	-0.128832	-0.265589	0.0157853	-0.0214434	-0.404884	0.0359423	0.35575	-0.513319	-0.22588	-0.298678	-0.422731	-0.4403	0.0868526	0.225303	0.151415	-0.0337246	0.0564472	-0.348366	-0.271459	-0.0431979	0.286145	-0.420159	0.224378	0.13943	-0.0785202	-0.00584032	-0.0931992	0.181153	0.26591	-0.27494	0.226805	0.0398389	-0.441931	-0.377321	0.309898	0.00894429	-0.184511	-0.213301	-0.282777	-0.343225	0.235441	0.179754	-0.179505	-0.293346
HALLMARK_TGF_BETA_SIGNALING	-0.433497	-0.303676	0.0502552	0.222725	0.324761	-0.206624	-0.0397956	0.400851	-0.388127	-0.181533	-0.272916	0.402555	-0.457607	-0.172271	-0.0995916	0.0415114	-0.3357	0.354193	0.2922	0.244011	0.0226198	0.332203	-0.570101	-0.0722149	-0.424543	0.354326	-0.309554	0.271159	0.220959	-0.22894	-0.382319	-0.241239	-0.151388	0.365225	0.0240168	-0.201311	-0.247948	-0.264294	-0.503263	0.47954	-0.190848	0.168255	-0.331563	-0.402385	-0.294398	0.305446	-0.356091	-0.170914	-0.505071
HALLMARK_IL6_JAK_STAT3_SIGNALING	-0.413348	-0.428389	-0.272305	-0.112552	0.0156102	-0.47105	-0.190288	0.333525	-0.485977	0.387109	-0.197245	-0.118121	0.0127878	-0.42403	-0.405062	-0.379435	0.445159	0.0236161	0.200108	-0.314838	-0.232081	0.439164	0.0737495	-0.0364904	-0.24303	0.30159	-0.0834795	0.459062	-0.348034	-0.260158	-0.512621	-0.33918	0.102859	0.124499	-0.0592442	-0.300533	0.147142	-0.273807	-0.314838	0.113528	0.301764	0.285326	-0.374698	-0.470407	-0.3469	0.178572	0.141664	0.319685	-0.427663
HALLMARK_DNA_REPAIR	-0.385609	-0.101189	-0.0529358	0.182382	-0.461424	-0.217737	-0.390773	0.293711	0.215711	-0.282158	0.42312	0.175736	-0.203612	-0.0646115	0.0082297	-0.0739706	-0.41482	0.445797	0.288672	0.159267	0.271129	0.0597564	-0.208597	-0.526677	-0.132249	0.00522487	-0.414082	-0.488618	0.24797	-0.0948957	0.109563	-0.423351	-0.0151704	0.0978509	-0.416255	-0.314217	0.436268	0.147524	0.0307964	-0.345941	0.28467	0.0861782	-0.270074	-0.0523897	0.395067	-0.481935	0.256974	-0.107887	-0.0501117
HALLMARK_G2M_CHECKPOINT	-0.638878	-0.640127	-0.0027507	0.360117	-0.499406	-0.367764	-0.0560415	0.662106	0.351796	-0.528784	0.397237	0.27218	-0.234222	-0.497072	-0.116939	0.33788	-0.632346	0.318239	0.535404	0.414974	0.427257	0.435961	-0.477499	-0.609957	-0.498965	-0.15694	-0.345689	-0.527294	0.456645	-0.495522	-0.0143642	-0.108794	0.345045	0.378688	-0.588855	-0.136705	0.570398	-0.102228	-0.351904	-0.455353	0.363168	0.488675	-0.631728	0.0614261	0.454617	-0.288155	0.11409	0.299261	-0.276646
HALLMARK_APOPTOSIS	-0.38988	-0.0425796	-0.194618	-0.089774	0.140759	-0.288876	-0.317599	0.118576	-0.348414	0.182088	-0.114825	-0.23066	0.0344712	-0.169802	-0.316241	-0.131796	-0.0963905	-0.00139347	0.0813577	-0.111284	-0.111597	0.20567	-0.290353	-0.175075	-0.157316	0.346614	-0.239287	0.271576	-0.0680732	0.0329479	-0.287988	-0.348311	-0.00956295	-0.0331678	-0.0948569	-0.0556967	0.0341436	-0.0210223	-0.187574	0.201994	0.0143128	0.166169	-0.174879	-0.359428	-0.0892973	0.215699	-0.0524228	0.0164776	-0.230479
HALLMARK_NOTCH_SIGNALING	-0.30199	-0.185249	0.258241	-0.116866	0.173152	-0.41365	-0.0763254	0.132835	-0.147595	-0.170123	-0.398241	0.436884	-0.368042	-0.150378	-0.338228	0.143562	-0.247768	0.440199	0.156932	0.090866	-0.120835	0.113031	-0.378601	-0.0835263	-0.225593	-0.0143705	-0.440785	0.206675	0.0379906	0.197824	-0.256609	-0.122649	-0.217978	0.341905	-0.0436336	0.132102	-0.268257	-0.0267732	-0.194443	0.325594	-0.248065	0.176269	-0.294757	-0.290001	-0.276023	0.177082	-0.242605	-0.0944323	-0.202547
HALLMARK_ADIPOGENESIS	-0.0847935	0.108768	0.305383	-0.303929	0.390772	0.0197891	-0.259752	-0.187447	0.058596	0.453067	-0.0384287	-0.484222	0.072761	0.266311	-0.0668769	-0.0434683	0.0827319	-0.0395488	-0.186205	-0.496236	0.0863844	-0.11328	-0.0967541	-0.112783	0.158249	0.176714	-0.301543	0.111795	0.190114	0.0541077	0.0233919	0.229469	-0.388482	-0.318204	0.336354	-0.133763	-0.197474	0.185375	0.0768277	0.279995	-0.345781	-0.124802	0.0673095	-0.120718	0.0388638	-0.116754	-0.212816	0.083363	-0.115131
HALLMARK_ESTROGEN_RESPONSE_EARLY	-0.153194	-0.070413	0.14804	-0.112413	0.271988	-0.0796034	-0.230622	0.0401943	-0.17744	0.182977	-0.232062	-0.193788	-0.231258	-0.0623582	-0.242639	-0.152453	0.0637184	0.0398562	-0.160866	-0.174439	-0.0835916	0.156818	-0.0568415	0.0587545	-0.0213877	0.265851	-0.188209	0.217754	0.0335645	0.25393	-0.264722	-0.124527	-0.184422	0.188294	0.0840708	-0.0463203	-0.362162	-0.134678	-0.190491	0.295213	-0.284263	0.0870535	-0.148845	0.000729395	-0.189692	0.180957	-0.0712131	-0.0826628	-0.155174
HALLMARK_ESTROGEN_RESPONSE_LATE	-0.133084	-0.00148481	0.0120635	-0.184136	0.200823	-0.200534	-0.309501	0.0375369	-0.0818435	0.291307	-0.13336	-0.251031	-0.0225264	-0.0622947	-0.334138	-0.122659	-0.0577327	0.0220379	-0.0867161	-0.235474	-0.118601	0.0181138	0.0747509	0.0706575	0.196198	0.113033	0.066822	0.101114	-0.00915426	0.196861	-0.26406	-0.0702245	-0.122339	0.180466	0.0483134	-0.138014	-0.193472	-0.0412739	0.0262574	0.21412	-0.0918981	-0.119944	-0.117898	0.0774601	-0.0780272	0.0604388	-0.0775809	-0.0257384	-0.0527161
HALLMARK_ANDROGEN_RESPONSE	-0.479863	-0.180974	0.0542588	-0.0184845	0.410432	-0.0567465	-0.0840383	0.165389	-0.393828	0.0779121	0.0227924	-0.247272	-0.439197	0.275874	-0.311355	-0.000574267	-0.0818338	-0.154304	0.0269401	-0.247057	0.0193021	0.176118	-0.205551	-0.097614	-0.140562	0.270509	-0.307251	0.131005	0.113898	-0.380717	-0.17787	-0.181916	-0.19411	-0.0901856	-0.0604085	0.018096	-0.0215376	-0.201131	-0.405042	0.32315	-0.290546	0.0868409	-0.0895984	-0.324558	-0.0782383	0.25879	-0.0467946	-0.00831638	-0.442285
HALLMARK_MYOGENESIS	-0.0905164	0.158165	0.141925	-0.0844278	0.213626	-0.245208	-0.233905	-0.232174	-0.34194	0.148286	-0.266755	-0.010576	0.0328367	-0.18225	-0.312662	-0.103741	-0.0129483	0.110852	-0.23237	0.0244409	-0.241019	-0.0399951	-0.0312311	0.240602	0.0439175	0.163156	-0.058879	0.3043	-0.139185	0.369767	-0.306162	0.0211754	-0.10623	0.20781	0.162747	0.0789709	-0.428199	0.189057	0.0405207	0.37879	-0.195307	-0.096614	-0.212273	0.0223462	-0.29614	0.19651	-0.149482	-0.0998626	0.0192464
HALLMARK_PROTEIN_SECRETION	-0.586201	-0.475681	0.387893	0.192469	0.410688	-0.209595	-0.0728206	0.435906	-0.298731	-0.156375	0.416843	0.132676	-0.606453	-0.174774	-0.299286	0.107471	-0.438812	0.0478622	0.229013	-0.169494	0.144271	0.351129	-0.562136	-0.519009	-0.504743	0.187501	-0.418592	-0.0754851	0.220203	-0.533834	-0.243078	0.213047	-0.104158	0.129911	-0.159138	0.393365	0.267316	-0.372593	-0.501737	0.348529	-0.261952	0.308936	-0.415497	-0.439767	0.263175	0.2838	0.0331469	0.291751	-0.519984
HALLMARK_INTERFERON_ALPHA_RESPONSE	-0.472112	-0.457634	-0.471766	-0.454564	0.3297	-0.278826	-0.266866	-0.18246	-0.306824	0.648243	-0.39003	-0.335593	0.177938	-0.460558	-0.0909295	-0.0127747	0.617425	-0.207845	0.444007	-0.459474	0.315898	0.488859	0.484893	-0.475352	-0.499838	0.548123	-0.415012	0.393975	-0.0814805	-0.118879	-0.20226	-0.458039	-0.468682	0.0853303	-0.186343	0.0404634	0.443677	0.353666	0.0318095	-0.170827	0.0521271	0.292008	-0.424797	-0.352401	-0.132899	-0.229309	-0.477938	0.047022	-0.253669
HALLMARK_INTERFERON_GAMMA_RESPONSE	-0.444381	-0.366212	-0.425621	-0.328146	0.148849	-0.331682	-0.300451	-0.150171	-0.434659	0.56737	-0.382363	-0.312057	0.303856	-0.444549	-0.339834	-0.121863	0.490029	-0.192738	0.367682	-0.391097	-0.0354979	0.494527	0.304412	-0.212832	-0.404473	0.443998	-0.315976	0.482466	-0.154567	-0.131194	-0.415922	-0.423033	-0.254264	0.0969188	-0.070602	-0.112603	0.401601	0.111472	-0.0783318	-0.000531217	0.205823	0.334506	-0.45291	-0.433036	-0.359517	-0.0101902	-0.352898	0.0676617	-0.351907
HALLMARK_APICAL_JUNCTION	-0.33793	-0.0768329	0.0849896	0.104684	0.254244	-0.294009	-0.173777	0.195274	-0.286322	0.0146171	-0.216422	0.130513	-0.235763	-0.265537	-0.328408	-0.00717191	-0.268896	0.237959	-0.00679322	0.116912	-0.126874	0.0614089	-0.251433	-0.0785107	-0.172191	0.277355	-0.217483	0.21268	-0.0185025	-0.020665	-0.263729	-0.175758	-0.0919284	0.170652	-0.0833589	-0.093401	-0.0978065	0.0245084	-0.24183	0.389229	-0.151314	0.148263	-0.341578	-0.256862	-0.161172	0.288191	-0.0455376	-0.0528313	-0.368362
HALLMARK_APICAL_SURFACE	-0.306208	-0.258012	0.0146179	0.123757	0.138081	-0.402736	0.0446819	0.066489	-0.161384	0.186811	-0.393463	0.0478534	0.0784013	-0.385471	-0.11823	-0.20749	-0.0502052	0.241273	0.240557	-0.157876	-0.273558	0.0574336	-0.159497	0.0523003	-0.112344	0.0120623	-0.0226991	0.373163	-0.0143961	0.0725753	-0.35607	-0.172496	-0.105548	0.318214	-0.185673	-0.248664	-0.117699	-0.0131774	-0.0716552	0.474664	0.148552	-0.040474	-0.307831	-0.295662	-0.342572	0.187077	-0.042803	-0.0898705	-0.282865
HALLMARK_HEDGEHOG_SIGNALING	-0.551409	-0.203196	0.527499	0.0841459	0.329968	-0.359161	-0.358856	0.369056	-0.12913	-0.226336	-0.423229	0.0658965	-0.340219	-0.19437	-0.3406	0.195337	-0.343357	0.300146	0.103532	0.189735	-0.0488847	0.242463	-0.35447	0.172813	-0.318976	0.13736	-0.3991	0.257254	-0.114518	0.0020513	-0.288972	0.128893	-0.216804	0.133698	-0.0844083	0.18334	-0.316683	-0.272937	-0.480797	0.500422	-0.344408	0.0478878	-0.335428	-0.297438	-0.28044	0.468735	-0.0701645	0.13477	-0.414216
HALLMARK_COMPLEMENT	-0.34397	-0.0960783	-0.0810837	-0.186667	0.208633	-0.302119	-0.345776	0.0207531	-0.448108	0.34468	-0.158825	-0.32321	0.20856	-0.238356	-0.337105	-0.115213	-0.000541853	-0.113001	0.15192	-0.368733	-0.210832	0.174914	-0.120588	0.0699849	-0.122163	0.382374	-0.183627	0.394474	-0.126812	-0.0904342	-0.397951	-0.256814	-0.0864276	0.0663039	0.0556093	0.0266972	0.166329	0.0452547	-0.127846	0.277858	0.0841019	0.12368	-0.268694	-0.422308	-0.21187	0.131346	-0.20054	0.0463131	-0.275916
HALLMARK_UNFOLDED_PROTEIN_RESPONSE	-0.463544	-0.332392	0.301689	0.0977768	-0.039387	-0.102867	-0.152303	0.288399	-0.214178	-0.276968	0.408254	-0.0442354	-0.495706	-0.0307399	-0.398404	-0.261131	-0.34136	-0.0965503	0.388121	0.038437	0.199804	-0.173952	-0.157373	-0.524689	-0.387861	0.123345	-0.406245	-0.439821	0.0606496	-0.181772	-0.176355	-0.161743	0.200447	0.0793188	-0.23438	0.260235	0.25411	-0.265979	-0.217437	-0.106852	0.105496	0.304394	-0.205149	-0.414368	0.157225	-0.180158	0.316544	0.0661416	-0.183676
HALLMARK_PI3K_AKT_MTOR_SIGNALING	-0.442794	-0.459774	0.180326	0.30586	-0.06725	-0.270792	0.0758036	0.459957	-0.111296	-0.40533	0.182253	0.0629327	-0.29709	-0.287901	-0.170986	-0.0926968	-0.417372	0.0541795	0.309127	0.0401469	0.059932	0.316529	-0.483171	-0.463859	-0.304258	0.211754	-0.326741	-0.163024	0.106247	-0.404776	-0.09987	-0.235559	-0.0515457	0.225077	-0.338537	-0.0847162	0.303995	-0.235256	-0.425643	0.220882	0.14149	0.0941647	-0.508982	-0.284497	0.0205643	0.0443901	0.245602	0.156914	-0.155542
HALLMARK_MTORC1_SIGNALING	-0.538116	-0.280275	0.144457	-0.129398	-0.0531207	-0.308705	-0.293098	0.299553	-0.0589658	0.0977992	0.415318	-0.430956	-0.287697	0.0175573	-0.300861	-0.283072	-0.401787	-0.0850479	0.309028	-0.41197	0.120066	0.112384	-0.163962	-0.481826	-0.140036	0.183525	-0.279769	0.0133555	0.165964	-0.218651	-0.14122	-0.206429	0.180218	-0.0649716	-0.240765	0.0216919	0.362828	-0.10028	-0.0704596	-0.175041	0.320464	0.264246	-0.315503	-0.30109	0.119257	-0.0710214	0.310278	0.419201	-0.114551
HALLMARK_E2F_TARGETS	-0.626618	-0.601647	-0.118895	0.310136	-0.568582	-0.414493	-0.240685	0.65669	0.425289	-0.542886	0.562198	0.140172	0.00523582	-0.471155	-0.0729107	0.340969	-0.679453	0.335238	0.50166	0.439012	0.486625	0.376581	-0.449858	-0.665121	-0.467682	-0.219819	-0.440516	-0.583722	0.524565	-0.496448	0.116438	-0.20158	0.3529	0.338476	-0.555238	-0.311778	0.632512	0.148874	-0.114366	-0.569644	0.390932	0.529143	-0.623131	0.159538	0.561638	-0.362184	0.244395	0.36076	-0.235179
HALLMARK_MYC_TARGETS_V1	-0.591229	-0.245876	0.209515	0.322125	-0.561658	-0.330025	-0.601014	0.382035	0.0581997	-0.46901	0.615075	-0.146141	-0.273189	-0.166227	-0.408193	-0.142465	-0.577163	0.452384	0.50759	0.314038	0.245919	0.217549	-0.12685	-0.645351	-0.182402	-0.102353	-0.336384	-0.490194	0.136955	-0.0619609	0.162918	-0.431274	0.455215	-0.146817	-0.548218	-0.166538	0.609052	-0.204631	0.0132303	-0.423048	0.466067	0.194698	-0.462893	-0.410192	0.525586	-0.464316	0.32348	0.182902	-0.192424
HALLMARK_MYC_TARGETS_V2	-0.45814	-0.143696	0.291011	0.299295	-0.626501	-0.283049	-0.589992	-0.0412766	0.259153	-0.507617	0.554055	-0.287082	-0.454526	-0.087731	-0.373326	-0.527182	-0.480593	0.290525	0.558738	0.189659	0.185336	-0.192937	0.301996	-0.612428	-0.0529772	0.0689101	-0.43436	-0.55526	-0.157146	0.21292	-0.0496253	-0.500725	0.553539	-0.312698	-0.656177	0.0111813	0.536963	-0.478557	-0.00187475	-0.457698	0.516142	-0.163116	-0.147571	-0.484548	0.474559	-0.575362	0.503945	0.22767	0.287524
HALLMARK_EPITHELIAL_MESENCHYMAL_TRANSITION	-0.324024	0.302937	0.0812871	-0.125125	0.245957	-0.539389	-0.53075	-0.0497855	-0.579753	0.334507	-0.376957	0.160382	0.0524706	-0.320596	-0.567312	0.215949	-0.0114787	0.209867	-0.314087	0.119498	-0.380367	0.318573	-0.187445	0.40844	-0.3147	0.406989	-0.154852	0.534199	-0.329111	0.203218	-0.363936	-0.432392	0.0301108	0.0993998	0.135301	0.229073	-0.380203	0.125157	0.0643166	0.489343	-0.163896	0.264637	-0.393033	-0.265819	-0.431715	0.435174	-0.278168	0.100943	-0.302266
HALLMARK_INFLAMMATORY_RESPONSE	-0.383085	-0.178724	-0.168442	-0.0779896	0.00138525	-0.450706	-0.401643	0.227144	-0.555119	0.405396	-0.243316	-0.18207	0.266738	-0.411505	-0.439988	-0.271155	0.0612485	0.0590463	0.129809	-0.120266	-0.303482	0.440506	0.013935	0.212916	-0.18051	0.468422	-0.215182	0.49917	-0.337972	-0.0574154	-0.47643	-0.454209	0.190513	0.118315	0.0225382	-0.0477163	0.203225	-0.292049	-0.254578	0.292178	0.289888	0.326454	-0.359421	-0.492413	-0.298442	0.270893	-0.168613	0.158024	-0.389525
HALLMARK_XENOBIOTIC_METABOLISM	0.18159	0.313065	-0.0207845	-0.321679	0.480922	0.248863	-0.329113	-0.471529	-0.00564924	0.571173	-0.198742	-0.549785	0.36435	0.474538	0.083753	0.255724	0.407983	-0.490065	-0.353405	-0.553685	0.114368	-0.343921	-0.0237661	0.284681	0.291479	0.130539	-0.0689756	0.156512	0.163542	0.0457321	0.100077	0.0489677	-0.465494	-0.370003	0.427472	-0.199935	-0.322784	0.447879	0.359768	-0.0311783	-0.445066	-0.200564	0.157374	-0.0479559	-0.0378691	-0.166216	-0.232193	-0.158211	-0.151236
HALLMARK_FATTY_ACID_METABOLISM	-0.0257755	0.257889	0.101843	-0.245343	0.453438	0.186638	-0.300633	-0.398769	0.0425335	0.46844	0.0484732	-0.549072	0.339107	0.300105	0.113909	0.0185545	0.350227	-0.14594	-0.276806	-0.567743	0.30299	-0.264606	1.04026e-05	0.159618	0.309997	0.0696118	-0.310145	0.316015	0.0662651	0.132274	0.158682	0.226278	-0.461608	-0.296387	0.40602	-0.373876	-0.183024	0.221304	0.325158	0.103597	-0.397944	-0.174631	0.131371	-0.0774097	-0.0723936	-0.12187	-0.166078	0.0310271	-0.222067
HALLMARK_OXIDATIVE_PHOSPHORYLATION	-0.142967	0.411677	0.602294	-0.334448	-0.158978	-0.158138	-0.624334	-0.413068	0.206193	0.389757	0.255971	-0.575944	0.338914	0.297421	-0.422115	-0.282354	-0.170872	0.541067	-0.232081	-0.492669	0.0164973	0.0789696	0.27664	-0.430719	0.525186	-0.0407452	-0.26843	-0.0971402	-0.227146	0.394169	0.301458	0.44971	-0.39567	-0.475843	0.298928	-0.373111	0.0631934	0.288516	0.444363	0.199943	0.0459582	-0.391284	0.0701215	-0.0223849	0.257768	-0.390163	-0.0505569	0.157715	0.150116
HALLMARK_GLYCOLYSIS	-0.240191	-0.141939	0.212048	-0.18787	0.225965	-0.190164	-0.228518	0.280132	0.0354507	0.202208	0.0055575	-0.279519	-0.1891	0.0145748	-0.200245	-0.0529145	-0.194884	0.0363334	-0.0519429	-0.273828	0.103609	0.0885839	-0.0361589	-0.214979	-0.181882	0.172818	0.00564957	-0.0987532	0.246877	0.0971044	-0.184258	-0.0371503	-0.0815038	0.0375523	-0.105713	0.0336927	-0.0486503	-0.00862008	-0.0050528	0.0475091	0.034737	-0.0114467	-0.207914	-0.044376	0.232284	-0.111147	0.0499104	0.30332	0.0666878
HALLMARK_REACTIVE_OXYGEN_SPECIES_PATHWAY	-0.300394	-0.0133876	-0.180397	-0.302388	-0.106019	-0.340447	-0.418078	-0.446956	-0.188178	0.477778	0.29652	-0.507506	0.0378871	0.203895	0.0412025	-0.17336	-0.0358504	-0.0238882	0.0282424	-0.387682	-0.115653	-0.324662	-0.038301	-0.413357	0.188339	0.397345	0.116826	0.345479	0.0437416	0.369955	-0.201889	-0.202941	-0.171783	0.214999	-0.211062	0.210527	0.112748	-0.178597	0.534881	-0.0997122	0.107744	-0.210587	0.224804	-0.25197	0.258782	-0.226655	-0.133974	0.208871	0.378982
HALLMARK_P53_PATHWAY	-0.318735	-0.0665287	-0.0986846	0.0177356	-0.138112	-0.231889	-0.269137	0.078391	-0.221107	0.134483	0.109886	-0.107948	-0.0882746	-0.160352	-0.119226	-0.303309	-0.255611	0.230597	-0.0706779	0.00272731	-0.00304238	0.170728	-0.307028	-0.0318162	-0.129274	0.265954	-0.199294	0.0168184	-0.0269314	0.0630062	-0.230516	-0.364696	-0.0268586	0.142586	-0.034533	-0.146139	-0.0897442	-0.0272342	-0.196535	0.0477536	-0.0906671	0.184954	0.0447725	-0.246199	-0.068127	-0.0468756	0.113153	0.0153831	-0.120921
HALLMARK_UV_RESPONSE_UP	-0.341666	-0.059685	0.0160283	-0.00209515	-0.0146521	-0.239297	-0.406808	0.0443899	-0.0541364	0.260246	-0.0304587	-0.313711	-0.151511	-0.034312	-0.291306	-0.371626	-0.0311088	0.0587033	0.157661	-0.161186	-0.0082348	-0.0442155	-0.0813304	-0.262733	-0.0106179	0.26933	-0.0846633	0.0537942	0.144053	0.185082	-0.217339	-0.251362	0.0604469	0.259515	-0.217975	0.028503	0.0405729	0.0100456	-0.00383573	0.000845779	0.154364	-0.0354756	0.0226084	-0.144946	0.0384771	-0.11854	-0.0247483	0.109249	-0.00850595
HALLMARK_UV_RESPONSE_DN	-0.416254	-0.107164	0.132553	0.162266	0.350165	0.00649967	-0.261864	0.246158	-0.453324	-0.275898	-0.380117	0.221677	-0.346262	0.0317428	-0.281781	0.350587	-0.231565	-0.0843147	-0.0967612	-0.0682056	-0.203627	0.306562	-0.488697	0.0802245	-0.37464	0.126986	-0.504549	0.237487	0.0721436	-0.364909	-0.338872	-0.151403	-0.274674	0.0134146	0.0549887	0.122319	-0.176275	-0.211208	-0.463598	0.435895	-0.319018	0.291001	-0.345025	-0.350739	-0.368477	0.406203	-0.232639	-0.275566	-0.499032
HALLMARK_ANGIOGENESIS	-0.233863	0.221075	0.304849	0.0287407	0.278975	-0.461066	-0.550733	-0.0325238	-0.664805	0.477552	-0.331985	0.169409	-0.095399	-0.311189	-0.638283	0.00810675	-0.0545968	0.346269	-0.238506	-0.0551078	-0.4285	0.306818	-0.0683282	0.484728	-0.223431	0.223106	0.00619591	0.495861	-0.28564	0.142278	-0.316135	-0.251169	-0.0228786	0.136378	0.428391	-0.161272	-0.475949	-0.115449	0.0138771	0.500659	-0.257903	0.19969	-0.216527	-0.309332	-0.527936	0.361025	-0.4026	0.141716	-0.352851
HALLMARK_HEME_METABOLISM	-0.421614	-0.186019	0.0858714	-0.154246	0.256882	0.0746256	-0.03939	0.092965	-0.224494	0.0508652	-0.0596188	-0.182209	-0.185379	0.0889766	-0.0114849	0.0623957	0.0539615	-0.0743866	-0.161482	-0.226291	0.132679	0.0473448	-0.294084	-0.18345	-0.221967	0.20146	-0.310894	-0.0021866	0.24826	-0.227843	-0.109239	-0.123523	-0.313485	0.00166902	0.0172173	0.14572	-0.00603588	0.0444625	-0.215575	0.252585	-0.254529	0.0602258	-0.0538165	-0.152024	0.0362928	0.0706017	-0.0124422	-0.119968	-0.306217
HALLMARK_COAGULATION	0.150823	0.422247	0.105963	-0.317027	0.458311	-0.0144918	-0.420325	-0.424896	-0.371956	0.563223	-0.369704	-0.537208	0.368069	0.161286	-0.349957	0.0774638	0.236277	-0.350994	-0.331861	-0.439254	-0.112602	-0.355948	0.134054	0.455427	0.220414	0.215546	0.186155	0.374264	-0.0668747	-0.0425166	-0.285439	0.0176226	-0.348759	-0.18479	0.4358	-0.202605	-0.385791	0.291444	0.277775	0.338062	-0.287566	-0.169322	-0.0229921	-0.19174	-0.163609	-0.00783051	-0.320139	-0.156549	-0.228184
HALLMARK_IL2_STAT5_SIGNALING	-0.40159	-0.0495485	-0.161957	-0.0176313	-0.0501895	-0.340054	-0.385286	0.0463805	-0.39907	0.186401	-0.213111	-0.218221	0.0697042	-0.283337	-0.353752	-0.304632	-0.0193644	0.0360158	0.231159	-0.0950272	-0.306906	0.347317	0.0187648	0.105664	-0.0951414	0.252162	-0.0929521	0.409501	-0.179581	0.0699084	-0.317909	-0.374933	0.173405	0.125362	-0.149185	0.0383773	0.0322826	-0.280097	-0.163225	0.246179	0.087021	0.156599	-0.106845	-0.379933	-0.17492	0.327213	-0.12455	-0.0325939	-0.165007
HALLMARK_BILE_ACID_METABOLISM	0.177735	0.34565	0.106945	-0.280312	0.540459	0.42874	-0.168562	-0.438299	0.0255391	0.472149	-0.161405	-0.563241	0.225792	0.484755	0.252358	0.350697	0.265664	-0.556116	-0.432735	-0.579186	0.377439	-0.339373	-0.0389817	0.2432	0.111594	0.202288	-0.250895	0.134146	0.249973	-0.0376827	0.365422	0.299344	-0.556195	-0.367779	0.409451	-0.120002	-0.22078	0.404569	0.239021	-0.089496	-0.555767	-0.0397642	0.276084	0.14132	-0.172683	0.103096	-0.188913	-0.337831	-0.309212
HALLMARK_PEROXISOME	-0.106673	0.0948941	0.247524	-0.129226	0.325945	0.157778	-0.0571422	-0.274832	0.0742911	0.396046	0.179467	-0.45589	0.0175507	0.307951	0.165217	0.0558786	0.121836	-0.14826	-0.272697	-0.421304	0.293416	-0.245436	-0.141789	-0.240835	-0.169672	0.135781	-0.093924	-0.0304544	0.285847	-0.0852958	0.257309	0.0917474	-0.396358	-0.0182081	0.232517	-0.24445	0.0108449	0.303878	0.0230605	-0.00523765	-0.377646	0.003663	0.259694	0.0688131	0.0705759	-0.0816422	-0.0760764	0.0772015	-0.362383
HALLMARK_ALLOGRAFT_REJECTION	-0.361165	-0.323143	-0.296054	0.191776	-0.355587	-0.541155	-0.464691	0.14337	-0.642989	0.396404	-0.192244	-0.149139	0.441433	-0.563831	-0.536436	-0.292029	0.0869496	0.0997347	0.451395	-0.153588	-0.44491	0.462268	0.244991	0.205136	-0.280689	0.383228	0.0225629	0.517242	-0.44974	0.0287485	-0.52415	-0.453839	0.365273	0.0286787	-0.293875	0.0525924	0.46224	-0.285446	-0.0578265	0.283427	0.480495	0.28003	-0.477807	-0.53336	-0.285802	0.251111	-0.0990247	0.11491	-0.343127
HALLMARK_SPERMATOGENESIS	-0.29607	-0.0166883	-0.0554627	-0.186349	-0.159886	-0.102699	-0.00825529	0.257838	0.132605	-0.223909	0.167055	-0.0915263	0.099477	-0.115954	-0.120043	0.151698	-0.199463	-0.00265065	0.259043	0.183858	0.0798606	-0.000511083	-0.0896485	-0.178684	-0.106778	-0.0183778	-0.139299	-0.277857	0.143404	-0.0936335	0.0177681	-0.0479902	0.144437	-0.0517839	-0.117463	-0.0574974	0.315057	0.0470646	-0.00955352	-0.068286	0.247364	-0.0493384	-0.185695	0.184477	0.191727	0.00690694	0.0957751	0.165283	-0.131673
HALLMARK_KRAS_SIGNALING_UP	-0.244396	0.069747	-0.0149409	-0.0692911	0.265358	-0.266025	-0.386357	0.130885	-0.467136	0.250639	-0.26923	-0.160438	0.186672	-0.300367	-0.419243	-0.0235396	0.00117166	-0.152043	-0.00611335	-0.198555	-0.343536	0.18068	-0.0117547	0.250658	-0.146052	0.292132	-0.153178	0.444744	-0.194958	-0.00447513	-0.416016	-0.277982	-0.00692962	0.0534829	0.101375	0.198687	-0.103057	-0.222667	-0.0950445	0.341502	0.0388996	0.234548	-0.30836	-0.410887	-0.261321	0.388857	-0.260885	0.026091	-0.237268
HALLMARK_KRAS_SIGNALING_DN	0.184511	0.0234478	0.0199523	-0.0776998	0.256189	-0.00413821	-0.144902	-0.0224345	0.00160266	0.238737	-0.235532	-0.252884	0.0840409	0.0872437	-0.0896122	-0.131447	0.14802	-0.0822406	-0.0536316	-0.0308906	-0.0809655	-0.0402459	0.119367	0.153563	0.292009	0.119919	0.156694	0.114541	-0.0562966	0.195479	-0.17981	0.17692	0.0731029	0.0746084	0.158393	-0.116398	-0.198847	0.0735613	0.0889584	0.144759	0.000326743	-0.238592	-0.00414481	0.0916464	-0.236756	0.149092	-0.154468	-0.13551	0.00367001
HALLMARK_PANCREAS_BETA_CELLS	0.273959	0.274423	0.224827	0.0696049	0.0594259	0.26072	-0.148927	0.0996173	0.188638	0.215691	-0.0862271	-0.387963	-0.231899	0.158566	-0.151251	0.265041	0.0834028	-0.28074	-0.120094	-0.348496	0.0970545	-0.370597	-0.0948178	0.034638	0.364786	-0.0886017	-0.117691	0.133945	0.0299249	0.125053	0.105756	0.202862	-0.0730204	0.194444	0.297722	-0.0164052	-0.132837	-0.023011	0.0476321	0.135446	0.0646147	-0.389358	0.36234	0.0580701	-0.213743	0.19297	-0.16254	-0.113046	-0.178975
[truncated: 322 more columns]
